# Supplementary material
Source: PubMed Central journal article supplement (PMC8336103)
Supplement: 13012_2021_1144_MOESM1_ESM.pdf [file 13012_2021_1144_MOESM1_ESM.pdf]

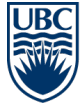

a place of mind

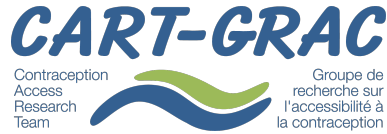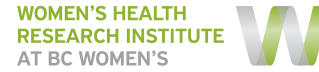

### Pharmacist Interview Script

#### Mifepristone Implementation Research in Canada (The CART-Mife Study)

#### 1. Demographic questions

“First let’s review the demographic information you provided in the survey in case anything has changed. I have a couple of Yes/No questions to begin.”

*Look first at their responses to the baseline survey. Read demographic section of survey aloud again and record any changes.*

| #   | Question                                                                                                                                                                                                                                                                                                                                              |
|-----|-------------------------------------------------------------------------------------------------------------------------------------------------------------------------------------------------------------------------------------------------------------------------------------------------------------------------------------------------------|
| 1a. | <p>In your survey you responded that you <b>DO</b> plan to <u>stock</u> mifepristone at your facility.</p> <p>Is that still your plan?</p> <ul style="list-style-type: none"> <li>• Yes</li> <li>• No</li> </ul> <p>(If yes) Have you begun to stock mifepristone?</p> <ul style="list-style-type: none"> <li>• Yes</li> <li>• No</li> </ul>          |
| 1b. | <p>In your survey you responded that you <b>DO NOT</b> plan to <u>dispense</u> mifepristone at your facility.</p> <p>Is that still your plan?</p> <ul style="list-style-type: none"> <li>• Yes</li> <li>• No</li> </ul> <p>(If no) Have you begun to dispense mifepristone?</p> <ul style="list-style-type: none"> <li>• Yes</li> <li>• No</li> </ul> |

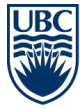

a place of mind

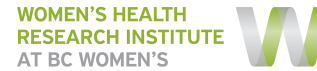

## 2. Interview questions

Thank you. I would first like to know a little more about your experience since mifepristone became available in Canada.

| #  | Question                                                                                                                                                                                                                  | Probe                                                                                                                                                                                                            | Construct                                                         |
|----|---------------------------------------------------------------------------------------------------------------------------------------------------------------------------------------------------------------------------|------------------------------------------------------------------------------------------------------------------------------------------------------------------------------------------------------------------|-------------------------------------------------------------------|
| 1. | To begin, please tell me about your practice setting and your role in it.                                                                                                                                                 | Please tell me about your experience with mifepristone so far.                                                                                                                                                   |                                                                   |
|    |                                                                                                                                                                                                                           | Have you begun offering mifepristone abortions? Why / Why not?                                                                                                                                                   |                                                                   |
|    |                                                                                                                                                                                                                           | What is your past experience with abortion care? ( <i>Probe for type of abortion services available.</i> )                                                                                                       | Pre-existing knowledge skills, base (SA-AC)                       |
|    |                                                                                                                                                                                                                           | Can you describe your experience of <u>getting information</u> about how to implement mifepristone?                                                                                                              | Knowledge seeking (AC)<br>Interpret / integrate knowledge (SA-AC) |
|    |                                                                                                                                                                                                                           | How was getting that information similar or different from how you learn about implementing other new drugs?                                                                                                     | Learning style (AC)<br>Homophily (CI)                             |
| 2. | <b>What was your experience like bringing mifepristone abortion into your facility?</b><br><br>[For settings where it is not yet implemented, as what the participant thinks it WOULD be like for questions in section 2] | How did you / your setting make the decision to implement mifepristone? Who made the decision? What persuaded you?<br><br>( <i>How did you / your setting make the decision NOT to implement mifepristone?</i> ) | Decentralization (SA-S)<br>Decision-Making (IP)<br>Marketing (CI) |
|    |                                                                                                                                                                                                                           | Have you observed or experience a <u>gap</u> in that mifepristone would fill?                                                                                                                                    | Needs (AC)<br>Tension change (SR)                                 |
|    |                                                                                                                                                                                                                           | How does (would) mifepristone abortion fit with your previous <u>beliefs</u> and practices?                                                                                                                      | Motivation (AC)<br>Values and goals (AC)                          |



|    |                                                                                  |                                                                                                                                                                                                                                                                                                                                                                                                 |                                                                                 |
|----|----------------------------------------------------------------------------------|-------------------------------------------------------------------------------------------------------------------------------------------------------------------------------------------------------------------------------------------------------------------------------------------------------------------------------------------------------------------------------------------------|---------------------------------------------------------------------------------|
|    |                                                                                  | How does (would) mifepristone abortion fit with your organization's previous <u>beliefs</u> and practices?                                                                                                                                                                                                                                                                                      | Homophily (CI)                                                                  |
|    |                                                                                  | What are the <u>expectations</u> of your organization or professional college regarding implementation of mifepristone?                                                                                                                                                                                                                                                                         | Inter-organizational norm-setting and networks (OC)                             |
|    |                                                                                  | Have there been (would there be) any <u>unintended benefits</u> to implementing mifepristone? Any <u>unintended consequences</u> ? Please describe them.                                                                                                                                                                                                                                        | Assessment of implications (SR)<br>Risk (I)                                     |
|    |                                                                                  | Can you tell me about any <u>political factors</u> that have affected the implementation of mifepristone?<br><br>Have you experienced pressure to implement mifepristone? (If YES: Can you describe what happened?)                                                                                                                                                                             | Socio-political climate (OC)                                                    |
|    |                                                                                  | How do (would) you use mifepristone? Have you <u>modified</u> (would you modify) the protocol in any way to fit your context?<br><br>What changes have you made (would you make) within your setting to implement mifepristone?                                                                                                                                                                 | Innovation-system fit (SR)<br>Potential for reinvention (I)<br>Reinvention (IP) |
|    |                                                                                  | Can you describe the patient care pathway for mifepristone medical abortion in your setting (or what it would look like)? ( <i>Probe for appointments, counseling rooms, prescriber relationships, dispensing, where and how each step takes place</i> )                                                                                                                                        | Complex, nonlinear process (A)                                                  |
|    |                                                                                  | How does (would) mifepristone medical abortion <u>impact your work</u> ? ( <i>Probe for: Time, Resources, Professional relationships, Patients' ability to access abortion</i> )                                                                                                                                                                                                                | Dedicated time and resources (SR)<br>Slack resources (SA-S)                     |
| 3. | <b>What things make it challenging to provide mifepristone medical abortion?</b> | <i>Probe for the impact of the following factors:</i> <ul style="list-style-type: none"> <li>• Cost (such as provincial coverage, financial disincentives, uncertainty about coverage)</li> <li>• Clinical workflow (such as counselling, following up; changing from a surgical to a medical abortion clinic)</li> <li>• Documentation (such as Health Canada forms, consent forms)</li> </ul> | Resource system (RS)<br>Environmental stability (OC)<br>Task issues (I)         |



|    |                                                                                                                   |                                                                                                                                                                                                                                                                                                                                                                                                                         |                                                                            |
|----|-------------------------------------------------------------------------------------------------------------------|-------------------------------------------------------------------------------------------------------------------------------------------------------------------------------------------------------------------------------------------------------------------------------------------------------------------------------------------------------------------------------------------------------------------------|----------------------------------------------------------------------------|
|    |                                                                                                                   | <ul style="list-style-type: none"> <li>• Pharmacy stock (such as ordering it)</li> <li>• Government support (such as political factors)</li> <li>• Restrictions (such as physician dispensing)</li> <li>• Anti-choice attitudes (such as among protestors or colleagues)</li> <li>• Having community access to surgery, ultrasound, or labs</li> <li>• Human resources (such as counsellors; staff burn out)</li> </ul> |                                                                            |
|    |                                                                                                                   | Have you learned about any changes to mifepristone regulations or coverage? What have you learned? Where did you get the information?                                                                                                                                                                                                                                                                                   | Reinvention (IP)<br>Complex, nonlinear process (A)<br>Fuzzy boundaries (I) |
|    |                                                                                                                   | What needs to change to make it easier to implement mifepristone?                                                                                                                                                                                                                                                                                                                                                       | Reinvention (IP)                                                           |
|    |                                                                                                                   | What are some of the <u>supports or structures</u> that would be helpful for implementing mifepristone?                                                                                                                                                                                                                                                                                                                 | Technical support (I)                                                      |
|    |                                                                                                                   | What kind of <u>human resources</u> do you need to support mifepristone medical abortion practice? (Do you have any gaps in human resources?)                                                                                                                                                                                                                                                                           | Human resources issues (IP)                                                |
|    |                                                                                                                   | What kind of <u>encouragement or incentives</u> have you encountered to implement mifepristone?                                                                                                                                                                                                                                                                                                                         | Incentives (OC)                                                            |
|    |                                                                                                                   | How comfortable are you with the uncertainty surrounding mifepristone? ( <i>Probe for federal restrictions, costs, and coverage</i> )                                                                                                                                                                                                                                                                                   | Tolerance of ambiguity (AC)                                                |
| 4. | <b>In your practice setting, who is involved in implementing mifepristone? What are they doing to support it?</b> | <p>How many others are involved in prescribing for abortions? What kind of care do they provide?</p> <p>Do they recognize the need to adopt mifepristone practice?</p> <p>Does/Did your organization have a formal plan for implementing it in your context? What does it look like?</p>                                                                                                                                | Leadership and vision (SA-RC)                                              |
|    |                                                                                                                   | Is there any individual or organization you would describe as <u>unsupportive</u> ? What did they do?                                                                                                                                                                                                                                                                                                                   | Power balances (SR)                                                        |
|    |                                                                                                                   | How easy or hard is it to communicate with your pharmacy,                                                                                                                                                                                                                                                                                                                                                               | Differentiation (SA-S)                                                     |



a place of mind

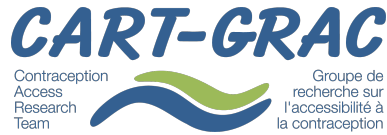

|    |                                                                                                                          |                                                                                                                                                                           |                                                                                           |
|----|--------------------------------------------------------------------------------------------------------------------------|---------------------------------------------------------------------------------------------------------------------------------------------------------------------------|-------------------------------------------------------------------------------------------|
|    |                                                                                                                          | hospital, or other clinicians about mifepristone?                                                                                                                         |                                                                                           |
|    |                                                                                                                          | Have you given <u>feedback</u> or spoken out about the implementation process?<br>Can you describe that feedback? [i.e. spoken to the media, contacted college registrar] | Monitoring feedback (SR)                                                                  |
|    |                                                                                                                          | Have you <u>exchanged information</u> with anyone about mifepristone, either inside or outside of your organization?<br>What did that look like?                          | Knowledge sharing (SA-AC)<br>Internal/external communication (IP)<br>Social networks (CI) |
|    |                                                                                                                          | Have you <u>consulted</u> with anyone inside or outside your setting or an official expert regarding mifepristone or its implementation? What did you discuss?            | Peer / expert opinion leader (CI)                                                         |
|    |                                                                                                                          | Were there <u>key individuals</u> that rallied to support and implement mifepristone? Can you describe what they did?                                                     | Champions / change agents (CI)<br>Hands-on approach by leaders (IP)                       |
|    |                                                                                                                          | Were there key individuals that <u>connected</u> you with other stakeholders? Can you describe what they did?                                                             | Boundary spanner (CI)                                                                     |
| 5. | <b>Tell me about the <u>values and vision</u> of your organization and how they relate to implementing mifepristone.</b> | Does everyone share the same values?                                                                                                                                      | Clear goals and priorities (SA-RC)                                                        |
|    |                                                                                                                          | What are your <u>relationships</u> like between managers and staff in your organizations when it comes to implementing mifepristone?                                      | Managerial relations (SA-RC)                                                              |
|    |                                                                                                                          | In your organization, how <u>easy or hard</u> is it to implement new treatments like mifepristone?                                                                        | Risk-taking climate (SA-RC)                                                               |
|    |                                                                                                                          | Is there a <u>formal process</u> in your organization for making decisions and implementing new practices, like mifepristone?                                             | Formalization (SA-S)                                                                      |
| 6. | <b>What are the <u>advantages and</u></b>                                                                                | How <u>effective</u> is it compared to other abortion methods? Do you                                                                                                     | Relative advantage (I)                                                                    |



a place of mind

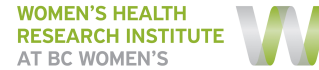

|                                                                                                            |                                                          |                                                                                                                                                            |                                                                            |
|------------------------------------------------------------------------------------------------------------|----------------------------------------------------------|------------------------------------------------------------------------------------------------------------------------------------------------------------|----------------------------------------------------------------------------|
|                                                                                                            | <b>disadvantages of mifepristone as a new treatment?</b> | see there being any downsides to having mifepristone available in Canada?                                                                                  |                                                                            |
|                                                                                                            |                                                          | How does dispensing mifepristone medical abortion fit in you're your current practice? (How <u>does it work</u> with the way care is currently delivered?) | Compatibility (I)                                                          |
|                                                                                                            |                                                          | How difficult is it to <u>understand</u> the steps involved in dispensing mifepristone medical abortion?                                                   | Complexity (I)                                                             |
|                                                                                                            |                                                          | How easy would it be to experiment with having mifepristone in your setting on a <u>trial basis</u> to see how it works?                                   | Trialability (I)                                                           |
|                                                                                                            |                                                          | Have you observed any impact or improvement in your <u>patient population</u> since implementing mifepristone? Can you please describe it?                 | Observability (I)                                                          |
|                                                                                                            |                                                          | How will you know that you are achieving good <u>outcomes</u> with implementing mifepristone in your context? What kind of outcomes are you tracking?      | High quality data capture (SA-RC)                                          |
| <b>We are curious to know more about your experience with the SOGC mifepristone training program, too.</b> |                                                          |                                                                                                                                                            |                                                                            |
| 7.                                                                                                         | <b>What was your experience of the training process?</b> | What made you decide to take the mifepristone training program?                                                                                            | Motivation (AC)<br>Values and goals (AC)                                   |
|                                                                                                            |                                                          | How was the mifepristone training similar or different from how you learn about other new practices?                                                       | Homophily (CI)<br>Cosmopolitanism (AC)                                     |
|                                                                                                            |                                                          | What is your preferred way of learning a new treatment?                                                                                                    | Learning style (AC)                                                        |
|                                                                                                            |                                                          | How much of the training did you do?                                                                                                                       | Skills (AC)                                                                |
|                                                                                                            |                                                          | Were there elements that were more or less difficult to learn?                                                                                             | Knowledge seeking (AC)<br>Nature of knowledge (I)                          |
|                                                                                                            |                                                          | How easy or hard was it to put your training into practice?                                                                                                | Ability to find, interpret, re-codify, and integrate new knowledge (SA-AC) |



a place of mind

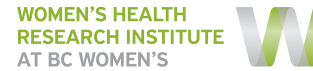

|                                                                                                                                                                           |                                                                                                                                 |                                                                                                                                                                                                                                                                                                                                                                                         |                                              |
|---------------------------------------------------------------------------------------------------------------------------------------------------------------------------|---------------------------------------------------------------------------------------------------------------------------------|-----------------------------------------------------------------------------------------------------------------------------------------------------------------------------------------------------------------------------------------------------------------------------------------------------------------------------------------------------------------------------------------|----------------------------------------------|
|                                                                                                                                                                           |                                                                                                                                 | How could the training be improved?                                                                                                                                                                                                                                                                                                                                                     |                                              |
| <b>We are also interested to learn about where you go for support with your medical abortion practice.</b>                                                                |                                                                                                                                 |                                                                                                                                                                                                                                                                                                                                                                                         |                                              |
| 8.                                                                                                                                                                        | <b>Are you a member of the Canadian Abortion Providers Support platform?</b><br><b>(If YES) Tell me your thoughts about it.</b> | (CAPS members) What do you like or dislike about the website?<br>How can it be improved?<br><br>(Non-members) Have you heard about the website?<br><br>If NO, explain what the website is before following up: Would joining this website be useful for you? Why / why not?<br><br>If YES: To help us make it useful for you, what are some reasons why you haven't joined the website? | Social networks (CI)                         |
|                                                                                                                                                                           |                                                                                                                                 | When you need information or advice about medical abortion, where else do you usually turn?                                                                                                                                                                                                                                                                                             | Social networks (CI)<br>Cosmopolitanism (AC) |
| <b>We are almost at the end of our questions. Through this study, we also want to understand why physicians and pharmacists might choose NOT to provide mifepristone.</b> |                                                                                                                                 |                                                                                                                                                                                                                                                                                                                                                                                         |                                              |
| 10.                                                                                                                                                                       | Is there anyone you recommend I talk to who has chosen not to take up medical abortion with mifepristone?                       | For instance, are there any physicians or pharmacists in your community who currently provide women's health care, but not abortion?                                                                                                                                                                                                                                                    |                                              |
| 11.                                                                                                                                                                       | Is there anything else you think I should know?                                                                                 |                                                                                                                                                                                                                                                                                                                                                                                         |                                              |
| 12.                                                                                                                                                                       | Do you have any questions for me?                                                                                               |                                                                                                                                                                                                                                                                                                                                                                                         |                                              |

**Additional items for consideration during analysis**

Adopter's belief that events are under one's personal control (internal) or that events are largely a matter of chance or due to external events (external).

Locus of control (AC)

*We include a locus of control measure in the survey component of this mixed methods study*

Number and experience of providers; Date of program inception.

Size/maturity (SA-S)



a place of mind

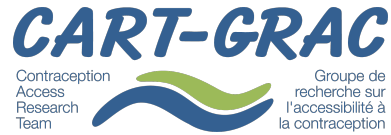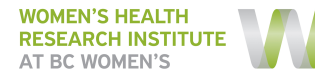

|                                                            |               |
|------------------------------------------------------------|---------------|
| <i>In the survey component of this mixed methods study</i> | Tenure (AC)   |
| Same as "Monitoring and Feedback (SR)"                     | Feedback (IP) |

### Glossary

- (I) Innovation
- (AC) Adopter characteristics
- (A) Assimilation
- (IP) Implementation process
- (CI) Communication and influence
- (SA-S) System antecedents – Structure
- (SA-AC) System Antecedents – Absorptive Capacity for New Knowledge
- (SA-RC) System Antecedents – Receptive Context for Change
- (SR) System Readiness
- (OC) Outer Context
- (RS) Resource System
